# Supplementary material
Source: MDPI journal article supplement (https://www.mdpi.com/2039-4713/14/1/3)
Supplement: s1 [file s1]

# Supplementary Materials: An Initial Survey on Occurrence, Fate, and Environmental Risk Assessment of Organophosphate Flame Retardants in Romanian Waterways

Iuliana Paun, Florinela Pirvu, Vasile Ion Iancu, Marcela Niculescu, Luoana Florentina Pascu and Florentina Laura Chiriac

National Research and Development Institute for Industrial Ecology—ECOIND, Drumul Podu Dambovitei Street 57-73, 060652 Bucharest, Romania

Tabel S1. Collection points and sample codification

| City           | WWTPs              |            |                                 |             |             | Natural receivers |             |             |
|----------------|--------------------|------------|---------------------------------|-------------|-------------|-------------------|-------------|-------------|
|                | WWTPs codification | Population | Daily flow (m <sup>3</sup> /zi) | Sample type | Sample code | River             | Sample type | Sample code |
| Targoviste     | S1                 | 79600      | 47606                           | Influent    | IF1         | Ialomita          | Upstream    | AM1         |
|                |                    |            |                                 | Effluent    | EF1         |                   | Downstream  | AV1         |
|                |                    |            |                                 | Sludge      | N1          |                   |             |             |
| Galati         | S2                 | 504000     | 224640                          | Influent    | IF2         | Siret             | Upstream    | AM2         |
|                |                    |            |                                 | Effluent    | EF2         |                   | Downstream  | AV2         |
|                |                    |            |                                 | Sludge      | N2          |                   |             |             |
| Glina          | S3                 | 1830000    | 1028160                         | Influent    | IF3         | Dambovita         | Upstream    | AM3         |
|                |                    |            |                                 | Effluent    | EF3         |                   | Downstream  | AV3         |
|                |                    |            |                                 | Sludge      | N3          |                   |             |             |
| Iasi           | S4                 | 793500     | 777600                          | Influent    | IF4         | Bahlui            | Upstream    | AM3         |
|                |                    |            |                                 | Effluent    | EF4         |                   | Downstream  | AV3         |
|                |                    |            |                                 | Sludge      | N4          |                   |             |             |
| Ramnicu Valcea | S5                 | 110527     | 88128                           | Influent    | IF5         | Olt               | Upstream    | AM4         |
|                |                    |            |                                 | Effluent    | EF5         |                   | Downstream  | AV4         |
|                |                    |            |                                 | Sludge      | N5          |                   |             |             |

Table S2. Physical-chemical properties of the OPFR compounds

| Nr. Crt. | Name                                  | Abrev | CAS No.    | Formula                                                         | MW <sup>a</sup> | Log K <sub>ow</sub> | Log K <sub>oc</sub> | Water solubility (mg/L) | BCF   |
|----------|---------------------------------------|-------|------------|-----------------------------------------------------------------|-----------------|---------------------|---------------------|-------------------------|-------|
| 1        | Tris (2-chloroethyl) phosphate        | TCEP  | 115-96-8   | C <sub>6</sub> H <sub>12</sub> Cl <sub>3</sub> O <sub>4</sub> P | 285.49          | 1.63                | 2.48                | 878                     | 0.42  |
| 2        | Tripropyl phosphate                   | TPP   | 513-08-6   | C <sub>9</sub> H <sub>21</sub> O <sub>4</sub> P                 | 224.23          | 1.87                | 2.83                | 827                     | 0.91  |
| 3        | Dibutyl phosphate                     | DBP   | 838-85-7   | C <sub>8</sub> H <sub>19</sub> O <sub>4</sub> P                 | 210.21          | 2.29                | 2.18                | 3830                    | 1.92  |
| 4        | Tris (1-chloro-2-propyl) phosphate    | TCPP  | 13674-84-5 | C <sub>9</sub> H <sub>18</sub> Cl <sub>3</sub> O <sub>4</sub> P | 327.57          | 2.59                | 2.21                | 1600                    | 7.94  |
| 5        | Tris(1,3-dichloro-2-propyl) phosphate | TDCPP | 13674-87-8 | C <sub>9</sub> H <sub>15</sub> Cl <sub>6</sub> O <sub>4</sub> P | 430.90          | 3.65                | 3.96                | 1.50                    | -     |
| 6        | Tris (2,3-dibromopropyl) phosphate    | TDBPP | 126-72-7   | C <sub>9</sub> H <sub>15</sub> Br <sub>6</sub> O <sub>4</sub> P | 697.61          | 3.71                | 3.40                | 8.0                     | 21.4  |
| 7        | Tris (2-ethylhexyl) phosphate         | TEHP  | 78-42-2    | C <sub>24</sub> H <sub>51</sub> O <sub>4</sub> P                | 434.63          | 9.49                | 6.36                | 0.0003                  | 3.16  |
| 8        | Triphenyl phosphate                   | TPHP  | 115-86-6   | C <sub>18</sub> H <sub>15</sub> O <sub>4</sub> P                | 326.28          | 4.59                | 3.72                | 1.03                    | 113.3 |
| 9        | Tricresyl phosphate                   | TMPP  | 1330-78-5  | C <sub>21</sub> H <sub>21</sub> O <sub>4</sub> P                | 368.36          | 6.34                | 4.34                | 0.018                   | 2534  |
| 10       | Bis(2-ethylhexyl) phosphate           | BEHP  | 298-07-7   | C <sub>16</sub> H <sub>35</sub> O <sub>4</sub> P                | 322.42          | 6.07                | 4.23                | 0.06                    | 49.5  |
| 11       | Diphenyl phosphate                    | DPHP  | 838-85-7   | C <sub>12</sub> H <sub>11</sub> O <sub>4</sub> P                | 250.18          | 2.88                | 2.08                | 82.4                    | 5.44  |

Table S3. Condition of instrumental analysis for OPFR compounds

|                          |                                                                  |
|--------------------------|------------------------------------------------------------------|
| Chromatographic column   | Zorbax Eclipse Plus C18 (150 x 2.1 mm, 3.5 µm)                   |
| Column temperature       | 40°C                                                             |
| Injection volume         | 10 µl                                                            |
| Mobile phase             | 0.1% formic acid in water (A) / 0.1% formic acid in methanol (B) |
| Mobile phase flow rate   | 0.2 mL/min                                                       |
| Sample solvent           | Water                                                            |
| Elution type             | gradient                                                         |
| Chromatographic run-time | 35 min                                                           |

Table S4. Gradient elution program

| Time (min)    | Mobile phase B (%) |
|---------------|--------------------|
| 0 - 0.50      | 60                 |
| 0.51 - 15.00  | 90                 |
| 15.01 - 20.00 | 100                |
| 20.01 - 25.00 | 100                |
| 25.01         | 60                 |
| 35.00         | Stop time          |

Table S5. Acquisition time-segments

| Time segment | Start Time (min) | Scan type | Div Valve | Store |
|--------------|------------------|-----------|-----------|-------|
| 1            | 0                | MRM       | To Waste  | No    |
| 2            | 6                | MRM       | To MS     | Yes   |
| 3            | 10               | MRM       | To MS     | Yes   |
| 4            | 13               | MRM       | To MS     | Yes   |
| 5            | 15.8             | MRM       | To MS     | Yes   |
| 6            | 18.8             | MRM       | To MS     | Yes   |
| 7            | 20.3             | MRM       | To MS     | Yes   |
| 8            | 22.4             | MRM       | To MS     | Yes   |
| 9            | 25               | MRM       | To Waste  | No    |
| 10           | 26               | MRM       | To MS     | Yes   |
| 11           | 29               | MRM       | To Waste  | No    |

Table S6. MRM conditions of OPFR (Q – quantifier, q - qualifier)

| Compounds | tR (min) | MRM<br>P → Q / P → q | Fragmentor<br>(V) | CE<br>(V) | CAV<br>(V) | Dwell<br>time<br>(msec) | ESI      |
|-----------|----------|----------------------|-------------------|-----------|------------|-------------------------|----------|
| DPHP      | 7.05     | 249.0→155.0          | 145               | 20        | 0          | 125                     | Negative |
|           |          | 249.0→93.2           | 145               | 30        | 1          | 125                     | Negative |
| DBP       | 7.56     | 209.2→153.0          | 120               | 10        | 4          | 125                     | Negative |
|           |          | 209.0→79.0           | 120               | 25        | 6          | 125                     | Negative |
| TCEP      | 11.48    | 285.0→99.0           | 110               | 25        | 5          | 250                     | Positive |
|           |          | 285.0→63.0           | 110               | 36        | 5          | 250                     | Positive |
| TPP       | 14.01    | 225.1→98.9           | 95                | 15        | 3          | 250                     | Positive |
|           |          | 225.0→141.0          | 95                | 5         | 4          | 250                     | Positive |
| TCPP      | 16.18    | 327.0→175.0          | 90                | 10        | 2          | 250                     | Positive |
|           |          | 327.0→99.0           | 100               | 25        | 4          | 250                     | Positive |
| TDCPP     | 19.80    | 432.9→99.1           | 125               | 30        | 1          | 250                     | Positive |
|           |          | 430.9→99.1           | 125               | 30        | 1          | 250                     | Positive |
| TPHP      | 20.57    | 327.1→215.0          | 165               | 25        | 4          | 175                     | Positive |
|           |          | 327.1→152.1          | 165               | 60        | 1          | 175                     | Positive |
| BEHP      | 20.93    | 321.3→79.2           | 190               | 35        | 2          | 175                     | Negative |
| TDBPP     | 22.93    | 698.6→98.9           | 135               | 25        | 5          | 125                     | Positive |
|           |          | 696.6→98.6           | 150               | 25        | 5          | 125                     | Positive |
| TMPP      | 23.52    | 369.1→91.0           | 185               | 45        | 3          | 125                     | Positive |
|           |          | 369.0→243            | 185               | 30        | 3          | 125                     | Positive |
| TEHP      | 26.75    | 435.4→98.9           | 125               | 15        | 4          | 250                     | Positive |
|           |          | 435.4→71.0           | 125               | 20        | 3          | 250                     | Positive |

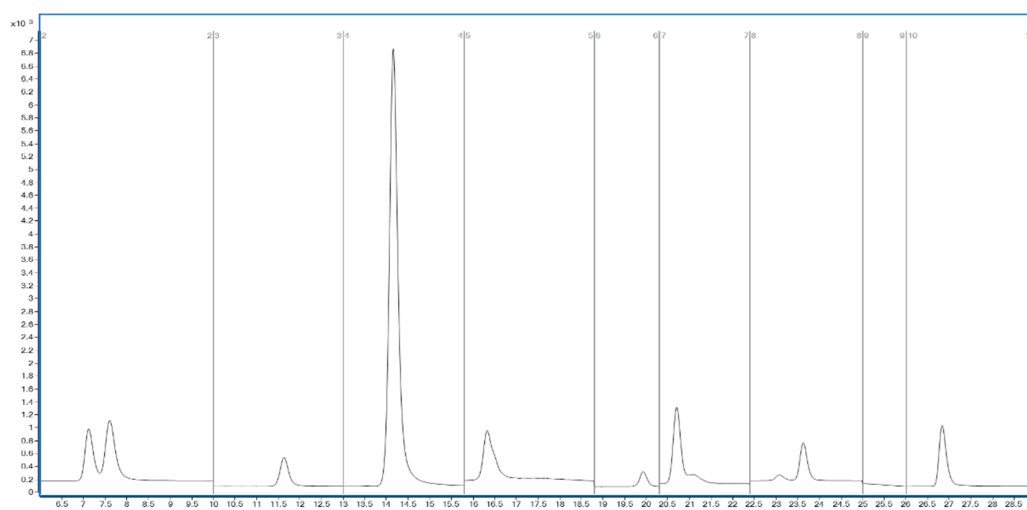

Figure S1. MRM chromatogram registered for a standard mixture of 1 µg/L

Tabel S7. RSD values for intra-day and inter-day precision obtained for a sike concentration of 1 µg/L in each environmental matrix.

| Analytes | RSD%                     |            |        |                     |            |        |                     |            |        |
|----------|--------------------------|------------|--------|---------------------|------------|--------|---------------------|------------|--------|
|          | Instrument repeatability |            |        | Intra-day precision |            |        | Inter-day precision |            |        |
|          | Surface water            | Wastewater | Sludge | Surface water       | Wastewater | Sludge | Surface water       | Wastewater | Sludge |
| DPHP     | 0.78                     | 0.83       | 1.19   | 3.94                | 4.23       | 5.35   | 8.74                | 9.37       | 11.2   |
| DBP      | 0.44                     | 0.65       | 1.26   | 4.59                | 5.16       | 6.66   | 8.53                | 10.1       | 11.4   |
| TCEP     | 0.93                     | 1.04       | 1.12   | 4.39                | 5.28       | 7.15   | 9.45                | 11.3       | 12.6   |
| TPP      | 0.85                     | 1.98       | 1.35   | 5.04                | 5.79       | 7.31   | 9.94                | 10.8       | 11.2   |
| TCPP     | 0.81                     | 0.96       | 1.02   | 4.36                | 5.44       | 6.72   | 7.22                | 8.64       | 10.0   |
| TDCPP    | 0.90                     | 1.04       | 1.27   | 4.23                | 4.96       | 5.68   | 8.39                | 9.28       | 10.3   |
| TPHP     | 0.79                     | 0.83       | 1.05   | 6.65                | 6.83       | 7.53   | 9.26                | 9.79       | 11.2   |
| BEHP     | 0.57                     | 0.72       | 0.83   | 3.83                | 4.25       | 6.44   | 7.14                | 8.85       | 10.2   |
| TDBPP    | 0.66                     | 0.81       | 0.95   | 4.17                | 5.17       | 6.81   | 8.85                | 9.66       | 11.0   |
| TMPP     | 0.82                     | 0.95       | 1.04   | 5.20                | 6.22       | 7.12   | 9.06                | 10.3       | 11.7   |
| TEHP     | 0.74                     | 0.87       | 1.08   | 3.96                | 4.31       | 5.23   | 6.16                | 8.25       | 10.1   |

Table S8. Recovery values obtained for all types of matrices (spike concentration = 1 µg/L, n = 3)

| Analytes | Recovery (%) |      |            |      |          |      |          |      |        |      |
|----------|--------------|------|------------|------|----------|------|----------|------|--------|------|
|          | Upstream     | ±SD  | Downstream | ±SD  | Effluent | ±SD  | Influent | ±SD  | Sludge | ±SD  |
| DPHP     | 84           | 2.69 | 81         | 2.59 | 79       | 3.40 | 76       | 3.27 | 79     | 3.87 |
| DBP      | 92           | 2.94 | 89         | 2.85 | 83       | 3.57 | 79       | 3.40 | 76     | 3.72 |
| TCEP     | 88           | 2.82 | 87         | 2.78 | 81       | 3.48 | 73       | 3.14 | 75     | 3.68 |
| TPP      | 86           | 2.75 | 82         | 2.62 | 83       | 3.57 | 81       | 3.48 | 84     | 4.12 |
| TCPP     | 89           | 2.85 | 84         | 2.69 | 80       | 3.44 | 88       | 3.78 | 88     | 4.31 |
| TDCPP    | 105          | 3.36 | 109        | 3.49 | 76       | 3.27 | 83       | 3.57 | 75     | 3.68 |
| TPHP     | 91           | 2.91 | 83         | 2.66 | 78       | 3.35 | 89       | 3.83 | 78     | 3.82 |
| BEHP     | 89           | 2.85 | 86         | 2.75 | 78       | 3.35 | 76       | 3.27 | 84     | 4.12 |
| TDBPP    | 85           | 2.72 | 86         | 2.75 | 90       | 3.87 | 83       | 3.57 | 86     | 4.21 |
| TMPP     | 92           | 2.94 | 82         | 2.62 | 91       | 3.91 | 87       | 3.74 | 114    | 5.59 |
| TEHP     | 88           | 2.82 | 77         | 2.46 | 88       | 3.78 | 84       | 3.61 | 78     | 3.82 |

Table S9. Matrix effects (ME) values determined for the targeted analytes in all environmental samples (post-extraction spike = 1 µg/L, n = 3)

| Analytes | EM, %    |      |            |      |          |      |          |      |        |      |
|----------|----------|------|------------|------|----------|------|----------|------|--------|------|
|          | Upstream | ±SD  | Downstream | ±SD  | Effluent | ±SD  | Influent | ±SD  | Sludge | ±SD  |
| DPHP     | 89       | 3.03 | 74         | 2.52 | 81       | 3.73 | 99       | 4.55 | 84     | 4.12 |
| DBP      | 98       | 3.33 | 81         | 2.75 | 70       | 3.22 | 80       | 3.68 | 73     | 3.58 |
| BEHP     | 58       | 1.97 | 75         | 2.53 | 74       | 2.52 | 77       | 3.54 | 74     | 3.63 |
| TCEP     | 90       | 3.06 | 80         | 2.72 | 77       | 3.54 | 100      | 4.60 | 80     | 3.92 |
| TPP      | 94       | 3.20 | 74         | 2.52 | 84       | 3.86 | 101      | 4.65 | 91     | 4.46 |
| TCPP     | 110      | 3.74 | 115        | 3.91 | 82       | 3.77 | 94       | 4.32 | 74     | 3.63 |
| TDCPP    | 96       | 3.26 | 85         | 2.89 | 86       | 3.96 | 93       | 4.28 | 85     | 4.17 |
| TPHP     | 79       | 2.69 | 79         | 2.69 | 86       | 3.96 | 75       | 3.45 | 90     | 4.41 |
| TDBPP    | 88       | 2.99 | 89         | 3.03 | 98       | 4.51 | 56       | 2.58 | 88     | 4.31 |
| TMPP     | 98       | 3.33 | 99         | 3.37 | 97       | 4.46 | 71       | 3.27 | 121    | 5.93 |
| TEHP     | 96       | 3.26 | 72         | 2.45 | 90       | 4.14 | 92       | 4.23 | 84     | 4.12 |

Table S10. Instrumental limit of quantitation (IOQ), and method limit of detection and quantitation obtained for the targeted compounds

| Analytes | IOQ  | Upstream |      | Downstream |      | Effluent |      | Influent |      | Sludge |      |
|----------|------|----------|------|------------|------|----------|------|----------|------|--------|------|
|          |      | LOD      | LOQ  | LOD        | LOQ  | LOD      | LOQ  | LOD      | LOQ  | LOD    | LOQ  |
|          | µg/L | ng/L     |      |            |      |          |      |          |      | ng/g   |      |
| DPHP     | 0.11 | 0.21     | 0.59 | 0.23       | 0.64 | 0.24     | 0.67 | 0.28     | 0.78 | 0.10   | 0.28 |
| DBP      | 0.11 | 0.19     | 0.53 | 0.24       | 0.67 | 0.29     | 0.81 | 0.31     | 0.87 | 0.11   | 0.32 |
| TCEP     | 0.09 | 0.34     | 0.95 | 0.31       | 0.87 | 0.3      | 0.84 | 0.33     | 0.92 | 0.09   | 0.26 |
| TPP      | 0.06 | 0.21     | 0.59 | 0.13       | 0.36 | 0.15     | 0.42 | 0.18     | 0.50 | 0.06   | 0.16 |
| TCPP     | 0.09 | 0.2      | 0.56 | 0.22       | 0.62 | 0.2      | 0.56 | 0.24     | 0.67 | 0.07   | 0.20 |
| TDCPP    | 0.15 | 0.17     | 0.48 | 0.24       | 0.67 | 0.34     | 0.95 | 0.37     | 1.04 | 0.15   | 0.42 |
| TPHP     | 0.10 | 0.2      | 0.56 | 0.21       | 0.59 | 0.22     | 0.62 | 0.25     | 0.70 | 0.09   | 0.26 |
| BEHP     | 0.28 | 0.24     | 0.67 | 0.27       | 0.76 | 0.27     | 0.76 | 0.31     | 0.87 | 0.23   | 0.67 |
| TDBPP    | 0.22 | 0.21     | 0.59 | 0.23       | 0.64 | 0.25     | 0.70 | 0.3      | 0.84 | 0.18   | 0.51 |
| TMPP     | 0.12 | 0.19     | 0.53 | 0.22       | 0.62 | 0.26     | 0.73 | 0.28     | 0.78 | 0.07   | 0.21 |
| TEHP     | 0.07 | 0.2      | 0.56 | 0.17       | 0.48 | 0.19     | 0.53 | 0.19     | 0.53 | 0.07   | 0.19 |

Table S11. Acute toxicities (LC50 and EC50) used to calculate risk quotients

| OPFRs | Aquatic organisms | Biota                           | End point           | Conc. effect (mg/L) | References |
|-------|-------------------|---------------------------------|---------------------|---------------------|------------|
| TCEP  | Fish              | Zebrafish                       | LC <sub>50</sub>    | 202                 | [1]        |
|       | Fish              | Carassius auratus               | L(E)C <sub>50</sub> | 90                  | [2]        |
|       | Daphnia           | Daphnia magna                   | EC <sub>50</sub>    | 381                 | [3]        |
|       | Algae             | Scenedesmus subspicatus         | EC <sub>10</sub>    | 6500                | [4]        |
| TDCPP | Fish              | Zebrafish                       | LC <sub>50</sub>    | 0.42                | [1]        |
|       | Fish              | Carassius auratus               | L(E)C <sub>50</sub> | 5.1                 | [2]        |
|       | Fish              | Oncorhynchus mykiss             | L(E)C <sub>50</sub> | 1.2                 | [2]        |
|       | Daphnia           | Daphnia magna                   | EC <sub>50</sub>    | 7.76                | [3]        |
|       | Algae             | Pseudokirchneriella subcapitata | L(E)C <sub>50</sub> | 39                  | [2]        |
| TCPP  | Fish              | Zebrafish                       | LC <sub>50</sub>    | 13.5                | [1]        |
|       | Fish              | Poecilia reticulata             | L(E)C <sub>50</sub> | 30                  | [2]        |
|       | Daphnia           | Daphnia magna                   | EC <sub>50</sub>    | 81                  | [3]        |
|       | Algae             | Scenedesmus subspicatus         | L(E)C <sub>50</sub> | 45                  | [2]        |
| TPHP  | Fish              | Zebrafish                       | LC <sub>50</sub>    | 1.03                | [1]        |
|       | Fish              | Oncorhynchus mykiss             | L(E)C <sub>50</sub> | 0.42                | [2]        |
|       | Daphnia           | Daphnia magna                   | EC <sub>50</sub>    | 1.7                 | [3]        |
|       | Algae             | Ankistrodesmus falcatus         | EC <sub>10</sub>    | 16                  | [2]        |
|       | Algae             | Scenedesmus quadricauda         | L(E)C <sub>50</sub> | 0.5                 | [2]        |
| TEHP  | Daphnia           | Daphnia magna                   | EC <sub>50</sub>    | 0.74                | [3]        |
| TMPP  | Daphnia           | Daphnia magna                   | EC <sub>50</sub>    | 0.31                | [3]        |
|       | Algae             | Gasterosteus aculeatus          | NOEC                | 3.2                 | [2]        |
| TPrP  | Fish              | Zebrafish                       | LC <sub>50</sub>    | 252                 | [1]        |
| TDBPP | Fish              | Salmo gairdneri                 | L(E)C <sub>50</sub> | 0.516               | [5]        |
|       | Daphnia           | Daphnia magna                   | L(E)C <sub>50</sub> | 4.568               | [5]        |
|       | Algae             | Scenedesmus abundans            | L(E)C <sub>50</sub> | 0.545               | [5]        |

Table S12.Environmental risk of OPFRs for aquatic organisms

| OPFRs | Aquatic organisms | Biota                           | AF   | PNEC<br>(µg/L) | RQ AM                 | Risk     | RQ AV                 | Risk     |
|-------|-------------------|---------------------------------|------|----------------|-----------------------|----------|-----------------------|----------|
| TCEP  | Fish              | Zebrafish                       | 1000 | 202            | $1.09 \times 10^{-4}$ | Low      | $6.98 \times 10^{-4}$ | Low      |
|       | Fish              | Carassius auratus               | 1000 | 90             | $2.44 \times 10^{-4}$ | Low      | 1.57E-03              | Low      |
|       | Daphnia           | Daphnia magna                   | 1000 | 381            | $5.77 \times 10^{-5}$ | Low      | $3.70 \times 10^{-4}$ | Low      |
|       | Algae             | Scenedesmus subspicatus         | 10   | 65             | $3.38 \times 10^{-4}$ | Low      | $2.17 \times 10^{-3}$ | Low      |
| TDCPP | Fish              | Zebrafish                       | 1000 | 0.42           | $2.62 \times 10^{-2}$ | Low      | 0.45                  | Moderate |
|       | Fish              | Carassius auratus               | 1000 | 5.1            | $2.16 \times 10^{-4}$ | Low      | $1.20 \times 10^{-2}$ | Low      |
|       | Fish              | Oncorhynchus mykiss             | 1000 | 1.2            | $9.17 \times 10^{-3}$ | Low      | $5.08 \times 10^{-2}$ | Low      |
|       | Daphnia           | Daphnia magna                   | 1000 | 7.76           | $1.42 \times 10^{-3}$ | Low      | $7.86 \times 10^{-3}$ | Low      |
|       | Algae             | Pseudokirchneriella subcapitata | 1000 | 39             | $2.82 \times 10^{-4}$ | Low      | $1.56 \times 10^{-3}$ | Low      |
| TCPP  | Fish              | Zebrafish                       | 1000 | 13.5           | $6.91 \times 10^{-2}$ | Low      | 0.12                  | Moderate |
|       | Fish              | Poecilia reticulata             | 1000 | 30             | $3.11 \times 10^{-2}$ | Low      | $5.34 \times 10^{-2}$ | Low      |
|       | Daphnia           | Daphnia magna                   | 1000 | 81             | $1.15 \times 10^{-2}$ | Low      | $1.98 \times 10^{-2}$ | Low      |
|       | Algae             | Scenedesmus subspicatus         | 1000 | 45             | $2.07 \times 10^{-2}$ | Low      | $3.56 \times 10^{-2}$ | Low      |
| TPHP  | Fish              | Zebrafish                       | 1000 | 1.03           | $7.18 \times 10^{-3}$ | Low      | $9.13 \times 10^{-2}$ | Low      |
|       | Fish              | Oncorhynchus mykiss             | 1000 | 0.42           | $1.76 \times 10^{-2}$ | Low      | $2.24 \times 10^{-2}$ | Low      |
|       | Daphnia           | Daphnia magna                   | 1000 | 1.7            | $4.35 \times 10^{-3}$ | Low      | $5.53 \times 10^{-3}$ | Low      |
|       | Algae             | Ankistrodesmus falcatus         | 10   | 0.16           | $4.63 \times 10^{-2}$ | Low      | $5.88 \times 10^{-2}$ | Low      |
|       | Algae             | Scenedesmus quadricauda         | 1000 | 0.5            | $1.48 \times 10^{-2}$ | Low      | $1.88 \times 10^{-2}$ | Low      |
| TEHP  | Daphnia           | Daphnia magna                   | 1000 | 0.74           | $4.19 \times 10^{-2}$ | Low      | $1.81 \times 10^{-2}$ | Low      |
| TMPP  | Daphnia           | Daphnia magna                   | 1000 | 0.31           | $6.13 \times 10^{-2}$ | Low      | $5.19 \times 10^{-2}$ | Low      |
|       | Algae             | Gasterosteus aculeatus          | 10   | 0.032          | 0.59                  | Moderate | 0.50                  | Moderate |
| TPP   | Fish              | Zebrafish                       | 1000 | 252            | $4.76 \times 10^{-6}$ | Low      | $3.97 \times 10^{-6}$ | Low      |
| TDBPP | Fish              | Salmo gairdneri                 | 1000 | 0.516          | $8.72 \times 10^{-2}$ | Low      | $7.33 \times 10^{-2}$ | Low      |
|       | Daphnia           | Daphnia magna                   | 1000 | 4.568          | $9.85 \times 10^{-3}$ | Low      | $8.27 \times 10^{-3}$ | Low      |
|       | Algae             | Scenedesmus abundans            | 1000 | 0.545          | $8.26 \times 10^{-2}$ | Low      | $6.94 \times 10^{-2}$ | Low      |

## References

1. Du, Z.K.; Wang, G.W.; Gao, S.X.; Wang, Z.Y.; Aryl organophosphate flame retardants induced cardiotoxicity during zebrafish embryogenesis: by disturbing expression of the transcriptional regulators. *Aquat. Toxicol.* **2015**, *161*, 25–32. Doi: 10.1016/j.aquatox.2015.01.027.
2. Verbruggen, E.M.J.; Rila, J.P.; Traas, T.P.; Posthuma-Doodeman, C.J.A.M.; Posthumus, R.; Environmental risk limits for several phosphate esters, with possible application as flame retardant. *ChemRxiv* **2005**. [http://refhub.elsevier.com/S0160-4120\(13\)00129-3/rf0285](http://refhub.elsevier.com/S0160-4120(13)00129-3/rf0285).
3. Cristale, J.; García Vázquez, A.; Barata, C.; Lacorte, S. Priority and emerging flame retardants in rivers: occurrence in water and sediment, Daphnia magna toxicity and risk assessment. *Environ. Int.* **2003**, *59*, 232–243. Doi: 10.1016/j.envint.2013.06.011.
4. European Commission, 2009. European Union risk assessment report: tris (2-chloroethyl) phosphate, TCEP. <https://echa.europa.eu/documents/10162/2663989d-1795-44a1-8f50-153a81133258>.
5. NICNAS (National Industrial Chemicals Notification and Assessment Scheme) (2005). Priority Existing Chemical Assessment Report No. 27. URL: [https://www.nicnas.gov.au/\\_\\_data/assets/word\\_doc/0020/34832/PEC27-TBBP.docx](https://www.nicnas.gov.au/__data/assets/word_doc/0020/34832/PEC27-TBBP.docx).
